# Supplementary material for: Variability of dimethyl sulphide (DMS), methanethiol and other trace gases in context of microbial communities from the temperate Atlantic to the Arctic Ocean
Source: Copernicus journal article supplement (doi:10.5194/bg-2022-150), 2022-07-21
Supplement: Supplementary file 1 [file bg-2022-150-supplement.pdf]

1 **Supplement**

2

3 Supplement S1

4 Table S1: Sea-ice stations >80°N where vertical profiles were obtained

| Station    | Date/Time (UTC)  | Latitude     | Longitude    | Sampling depths (m) |
|------------|------------------|--------------|--------------|---------------------|
| PS92/19_05 | 28/05/2015 06:28 | 81° 10.43' N | 19° 08.07' E | 0.5-10-20-30-40-50  |
| PS92/27_03 | 31/05/2015 06:52 | 81° 23.13' N | 17° 35.13' E | 0.5-10-20-30-40-50  |
| PS92/31_03 | 03/06/2015 11:44 | 81° 37.20' N | 19° 25.64' E | 0.5-10-25-30-40-50  |
| PS92/32_05 | 06/06/2015 20:04 | 81° 13.76' N | 19° 26.63' E | 0.5-10-25-30-40-50  |
| PS92/39_08 | 11/06/2015 15:05 | 81° 55.04' N | 13° 27.55' E | 0.5-10-30-35-40-50  |
| PS92/43_05 | 15/06/2015 04:45 | 82° 12.67' N | 07° 35.30' E | 0.5-10-20-30-40-50  |
| PS92/46_02 | 15/06/2015 04:45 | 82° 12.67' N | 07° 35.30' E | 0.5-10-20-30-40-50  |
| PS92/47_04 | 19/06/2015 12:03 | 81° 20.80' N | 13° 36.56' E | 0.5-10-20-30-40-50  |

5

6

7 Supplement S2

8 Biological measurements

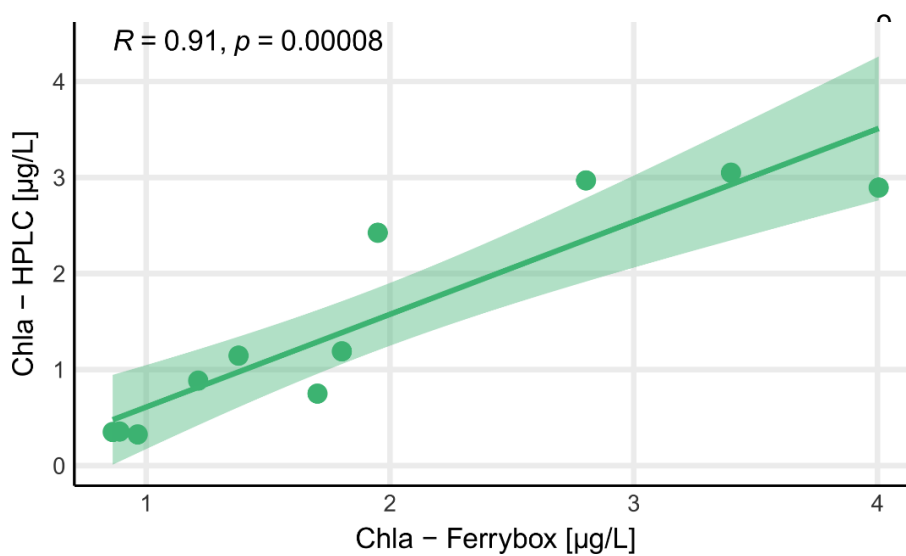

20 Figure S1: Relationship between chlorophyll a concentrations obtained from HPLC and Ferrybox.

21

22 Bacterial community analyses

23 16S rRNA gene amplicon libraries were prepared according to the standard instructions of the 16S  
 24 Metagenomic Sequencing Library Preparation protocol (Illumina, San Diego, CA). The hypervariable  
 25 V4–V5 region was amplified using primers 515F (GTGYCAGCMGCCGCGGTAA) and 926R  
 26 (CCGYCAATTYMTTTRAGTTT). Sequences were obtained on an Illumina MiSeq platform in 2x300  
 27 bp paired-end runs at CeBiTec (Bielefeld, Germany). Primer were clipped using cutadapt, and reads  
 28 processed into amplicon sequence variants (ASVs) following the standard DADA2 workflow at  
 29 <https://benjjneb.github.io/dada2/tutorial.html>. Filtering settings were truncLen=c(230,195), maxN=0,  
 30 minQ=2, maxEE=c(3,3) and truncQ=0, followed by merging using minOverlap=10, chimera removal  
 31 and taxonomic classificaton using the Silva v138 database. Data was processed in RStudio using R  
 32 v4.1.1 and packages phyloseq, vegan, iNEXT, tidyverse, psych and scico, with aesthetic modifications  
 33 of figures using Inkscape (<https://inkscape.org>). We obtained on average 85,000 quality-controlled,  
 34 chimera-filtered reads per sample (Table S2) sufficiently covering community composition (Fig. S2).  
 35 The complete amplicon workflow is available under <https://github.com/matthiaswietz/transsiz>.

36 Table S2: Amplicon-sequenced samples, showing read counts at each step of the DADA2 pipeline.

| sample_title | Date       | Lat      | Lon      | input  | filtered | denoised | merged | nochim | tabled |
|--------------|------------|----------|----------|--------|----------|----------|--------|--------|--------|
| PS92 Auto2   | 2015-05-21 | 60.35920 | 3.29927  | 118097 | 98967    | 98357    | 82764  | 82764  | 80333  |
| PS92 Auto3   | 2015-05-21 | 62.38333 | 3.35833  | 92223  | 78393    | 78082    | 70022  | 70022  | 67872  |
| PS92 Auto4   | 2015-05-22 | 64.52022 | 3.55040  | 131377 | 110858   | 110483   | 93018  | 93018  | 90123  |
| PS92 Auto5   | 2015-05-22 | 64.94027 | 3.58943  | 129259 | 109748   | 109459   | 104074 | 104074 | 98374  |
| PS92 Auto6   | 2015-05-22 | 65.90325 | 3.64348  | 159876 | 139180   | 138735   | 126581 | 126581 | 122124 |
| PS92 Auto7   | 2015-05-22 | 66.35847 | 3.72702  | 94039  | 79638    | 79452    | 66107  | 66107  | 64204  |
| PS92 Auto8   | 2015-05-22 | 66.76948 | 3.76842  | 147626 | 123900   | 123608   | 98729  | 98729  | 94205  |
| PS92 Auto9   | 2015-05-23 | 67.31610 | 3.82471  | 88694  | 75721    | 75541    | 64079  | 64079  | 61492  |
| PS92 Auto10  | 2015-05-23 | 67.89882 | 3.88550  | 103359 | 83813    | 83655    | 69791  | 69791  | 66430  |
| PS92 Auto11  | 2015-05-23 | 68.33135 | 3.91565  | 85213  | 72459    | 72343    | 59608  | 59608  | 57793  |
| PS92 Auto12  | 2015-05-23 | 68.68500 | 3.97063  | 130307 | 108826   | 108595   | 95159  | 95159  | 91516  |
| PS92 Auto13  | 2015-05-23 | 69.28850 | 4.01345  | 80729  | 67543    | 67404    | 55925  | 55925  | 54072  |
| PS92 Auto14  | 2015-05-23 | 69.49642 | 4.01595  | 121385 | 104120   | 103898   | 93522  | 93522  | 89969  |
| PS92 Auto15  | 2015-05-24 | 70.00000 | 10.00000 | 102120 | 86176    | 85987    | 77672  | 77672  | 74763  |
| PS92 Auto16  | 2015-05-24 | 70.22695 | 13.14900 | 114758 | 98526    | 98230    | 87839  | 87839  | 83624  |
| PS92 Auto17  | 2015-05-25 | 73.25000 | 12.25000 | 128590 | 108477   | 108250   | 91623  | 91623  | 88079  |
| PS92 Auto18  | 2015-05-25 | 74.13037 | 11.69167 | 138591 | 116132   | 115847   | 104990 | 104990 | 100890 |

|             |            |          |          |        |        |        |        |        |        |
|-------------|------------|----------|----------|--------|--------|--------|--------|--------|--------|
| PS92 Auto19 | 2015-05-25 | 74.84322 | 11.20822 | 108687 | 91919  | 91697  | 87735  | 87735  | 82825  |
| PS92 Auto20 | 2015-05-26 | 75.51768 | 10.72912 | 179367 | 152923 | 152479 | 146291 | 146291 | 137753 |
| PS92 Auto21 | 2015-05-26 | 76.76033 | 9.78639  | 137058 | 115973 | 115657 | 109506 | 109506 | 104299 |
| PS92 Auto22 | 2015-05-26 | 77.27977 | 9.35135  | 164814 | 141216 | 140814 | 129011 | 129011 | 124403 |
| PS92 Auto23 | 2015-05-27 | 80.87068 | 18.44780 | 123060 | 102837 | 102585 | 96182  | 96182  | 91236  |
| PS92 Auto24 | 2015-05-27 | 81.01718 | 19.84131 | 111661 | 93595  | 93043  | 84908  | 84908  | 79382  |
| PS92 Auto25 | 2015-05-28 | 81.17000 | 19.13450 | 133543 | 112984 | 112116 | 103696 | 103696 | 97757  |
| PS92 Auto26 | 2015-05-28 | 81.19041 | 19.09177 | 143276 | 122930 | 122362 | 107995 | 107995 | 102390 |
| PS92 Auto27 | 2015-05-29 | 81.20624 | 18.69745 | 87506  | 74860  | 74472  | 61118  | 61118  | 58023  |
| PS92 Auto28 | 2015-05-29 | 81.22513 | 18.58100 | 158441 | 138134 | 137782 | 129089 | 129089 | 121849 |
| PS92 Auto31 | 2015-05-30 | 81.23292 | 18.76116 | 107153 | 91266  | 91018  | 81765  | 81765  | 77238  |
| PS92 Auto33 | 2015-06-01 | 81.32160 | 17.30839 | 146149 | 124768 | 124324 | 111819 | 111819 | 107371 |
| PS92 Auto34 | 2015-06-02 | 81.52571 | 19.44756 | 122832 | 105891 | 105552 | 95344  | 95344  | 89608  |
| PS92 Auto35 | 2015-06-03 | 81.55412 | 19.51593 | 89976  | 73560  | 73331  | 57493  | 57493  | 55347  |
| PS92 Auto36 | 2015-06-04 | 81.52757 | 18.65566 | 81157  | 68831  | 68620  | 62260  | 62260  | 58519  |
| PS92 Auto38 | 2015-06-11 | 81.90915 | 13.40468 | 72012  | 59645  | 59380  | 49796  | 49796  | 48994  |
| PS92 Auto39 | 2015-06-15 | 82.20975 | 7.38825  | 97048  | 82690  | 82426  | 70980  | 70980  | 69627  |

37

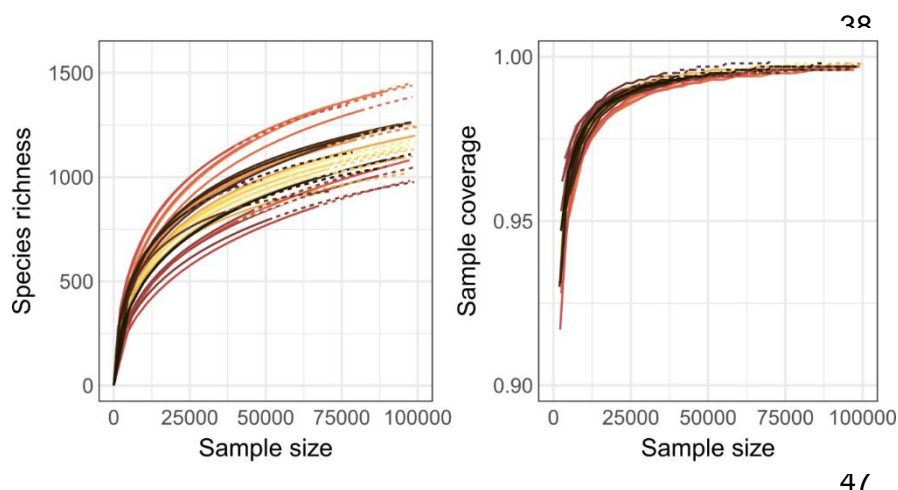

47

48 Figure S2: Rarefaction and coverage analyses of amplicon sequence variants, showing that community  
 49 composition was sufficiently covered. Each coloured line corresponds to an individual sample.

50 Supplement S3: Extraction system

51

52 Dissolved gases in seawater were quantified in the headspace of a glass cell, where gases were extracted  
53 by stripping with zero air at a flow rate of 100 mL/min. Three mini-water liquid diaphragm pumps KNF  
54 (type FEM 1.02.KT.18S. KNF (KNF Neuberger, IncTrenton, New Jersey USA), were used for the  
55 injection and circulation of seawater in the cell at 20 mL/min. Before entering the extraction cell, the  
56 water went through a mixing cell which was used for injection of a calibrated solution. For calibration,  
57 secondary standard liquid solutions were injected at a flow rate of 250  $\mu\text{L}/\text{min}$  by mean of a fine  
58 metering pump (World Precision Instruments; Hitchin, Hertfordshire, UK), and diluted in an identical  
59 flow of 20 mL/min of pure distilled water. Figure S3 shows a schematic view of the extraction device.

60

61

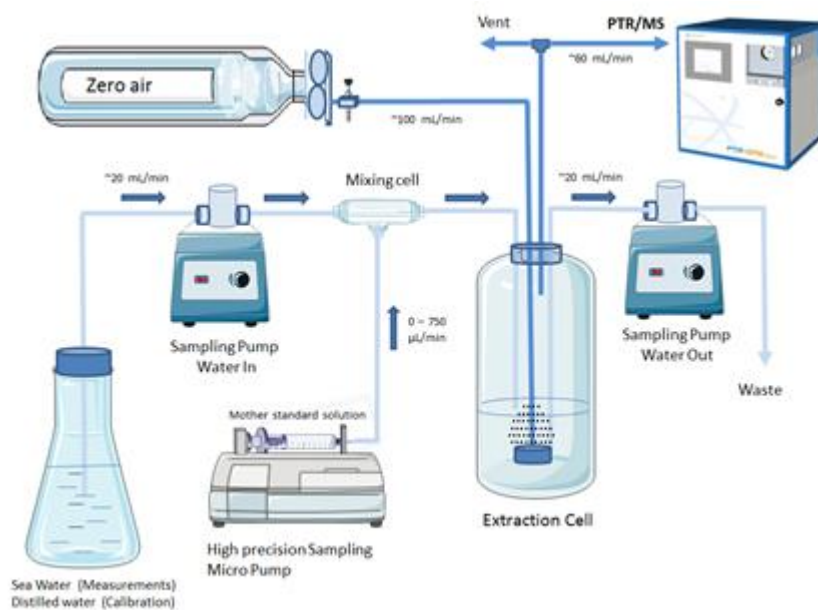

62

63

64 Figure S3: Schematic view of the extraction system

65

66 Supplement S4: Calibration procedure

67

68 For the calibration, stock solutions were prepared from pure substances (Sigma Aldrich) diluted in  
69 distilled water: isoprene ( $1.0 \times 10^{-4}$  M), dimethylsulphide ( $2.7 \times 10^{-3}$  M), acetaldehyde ( $8.95 \times 10^{-3}$  M),  
70 acetone ( $2.73 \times 10^{-2}$  M), acetonitrile ( $7.67 \times 10^{-3}$  M), and methanol ( $1.24 \times 10^{-1}$  M), all stored at 4°C.  
71 Secondary standard liquid solutions were prepared immediately before the calibrations from a dilution  
72 of  $2 \times 10^{-4}$  (0.2 mL/L) in distilled water. The injection of liquid standard was achieved by dilution of  
73 stock solution in distilled water by a high precision micro pump. The calibration factor was expressed  
74 as the ratio of the concentration of a given VOC in the water (nmol/L or pmol/L) to the concentration  
75 in the head space (ppbv) measured by PTR/MS. An example is given for the calibration for acetone  
76 (Fig. S4), with excellent linearity between the PPB measured in the headspace by PTRMS and the  
77 concentration in water. Experimentally this calibration factor is very close to the Henry's law constant  
78 (expressed in mol/L per atmosphere) whatever the solubility of the compound over 4 to 5 orders of  
79 magnitude (Fig. S5). Therefore, knowing the Henry's law constant, measurements can be reasonably  
80 extrapolated to new compounds detected in water which have not been previously calibrated (such as  
81 methanethiol).

82 Concerning the gas-phase calibration, a complete calibration had been done one month before the  
83 campaign in the laboratory using a calibration unit (Ionicon Analytik) and by injecting different  
84 amounts of a calibration gas mixture from Ionicon, allowing to derive sensitivity ncps/ppb for all  
85 compounds contained in the standard (methanol, acetaldehyde, acetonitrile, acetone and isoprene for  
86 the compounds of interest for this study). On the same day, a gas cylinder has been measured and  
87 brought on-board in order to check the stability of the detection (at the beginning and in the middle of  
88 the campaign). As lab- and ship-based results (in ncps) were congruent, the lab-determined calibration  
89 coefficients were used for the campaign. As DMS was not included in the standard, the calibration was  
90 done directly on water measurements by using the relation between ncps and concentration in the water  
91 of the injected standard.

92

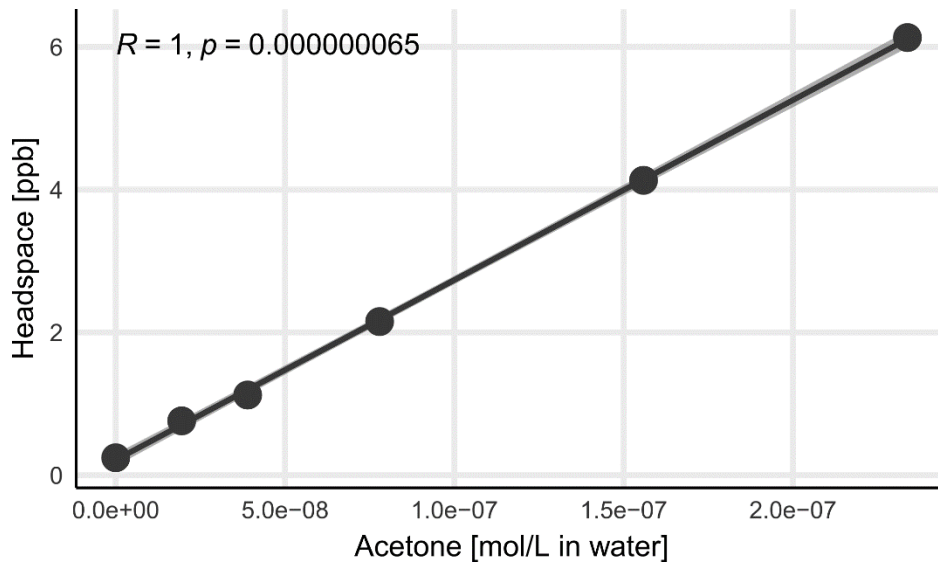

93

94

95 Figure S4: Calibration of acetone performed on-board

96

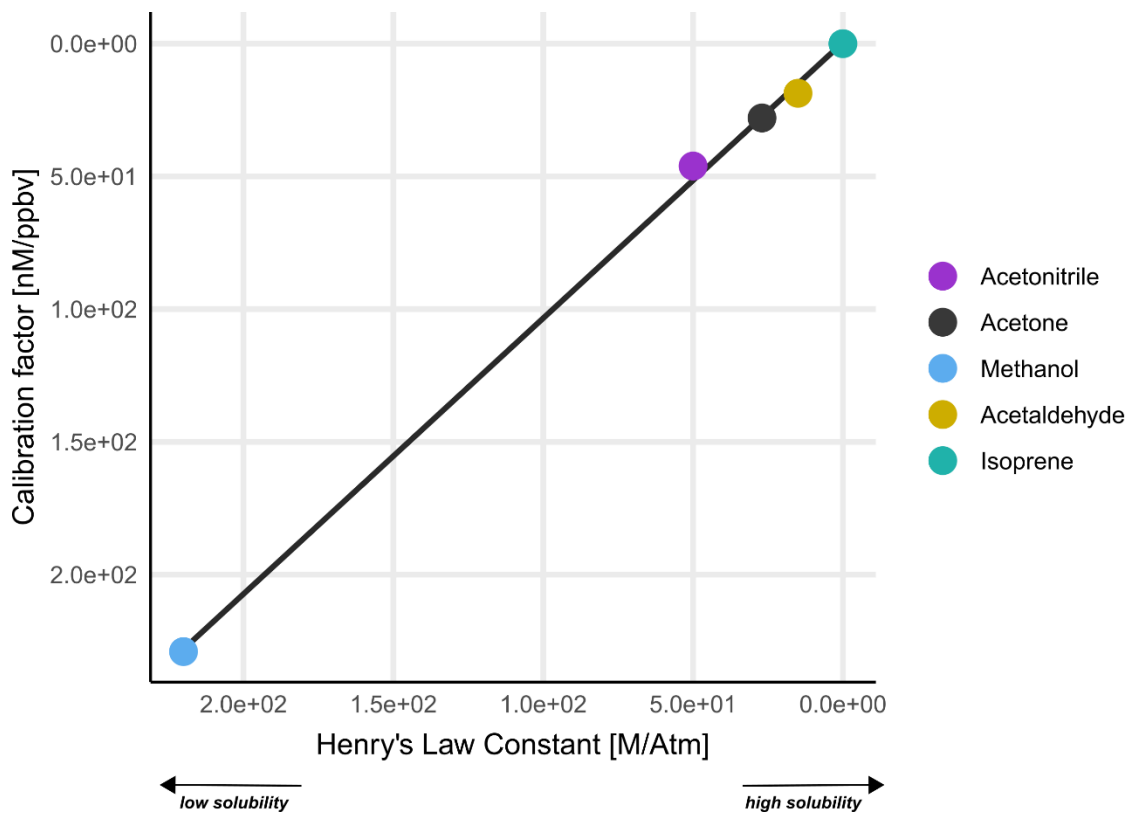

97

98

99 Figure S5: Calibration factor against Henry's law constant

100

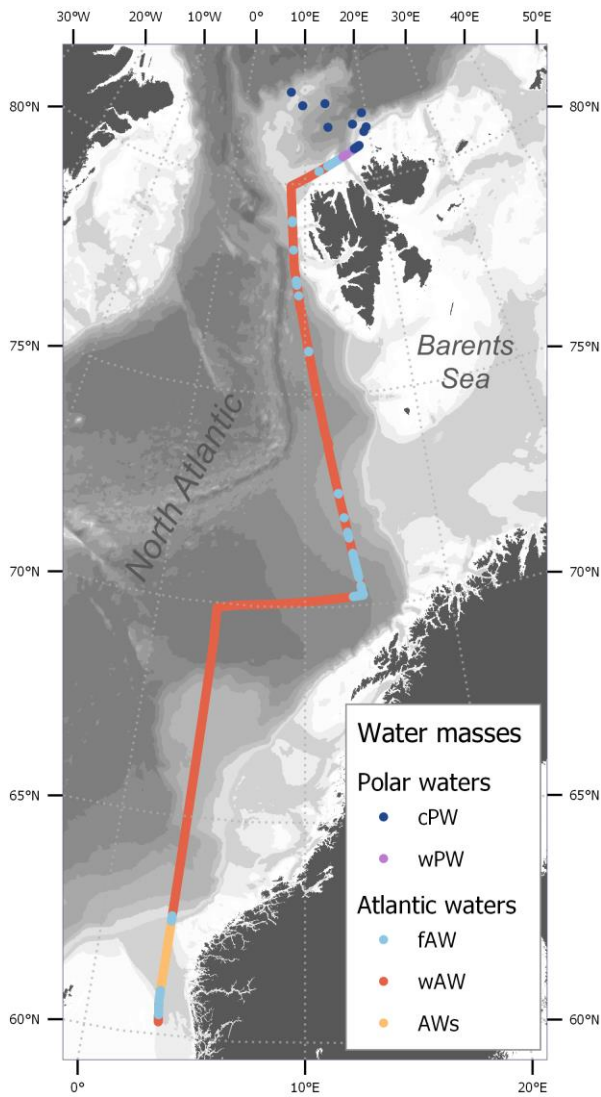

105 Figure S6: The sampled transect and sea-ice stations colour-coded by water mass: coastal influenced  
106 Atlantic water with low salinity (AWS), 'regular' warm Atlantic Water (wAW), fresh Atlantic Water  
107 (fAW), cold Polar Water (cPW) and warm Polar Water (wPW), see temperature and salinity criteria in  
108 Table 1.

117 Supplement S6: Vertical profiles of selected phytoplankton groups

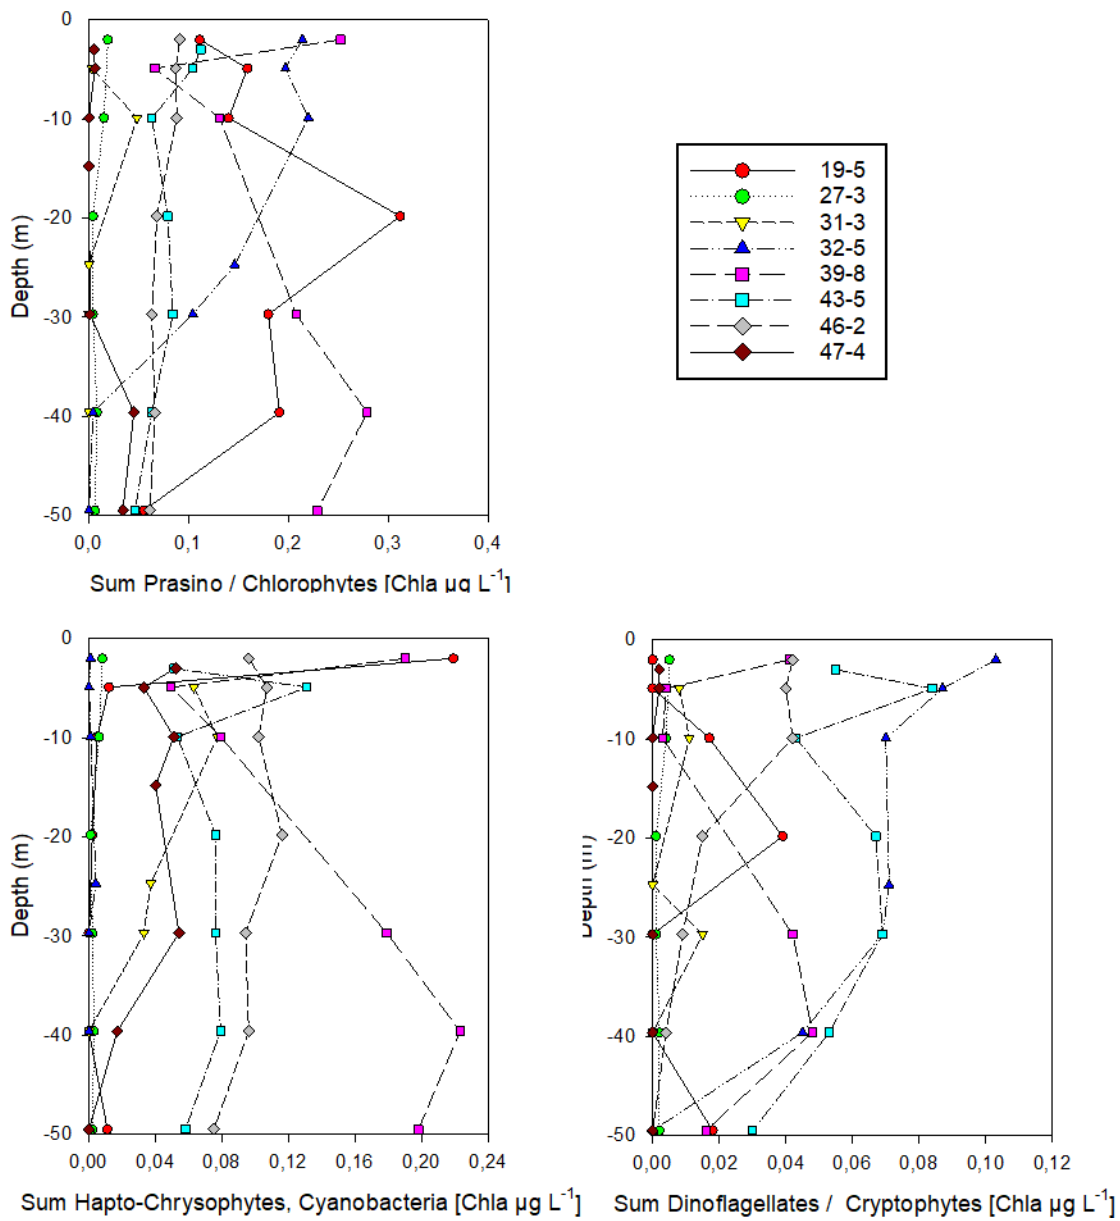

121 Figure S7: Depth profiles of selected phytoplankton groups, summarizing various types. Colors indicate

122 stations.



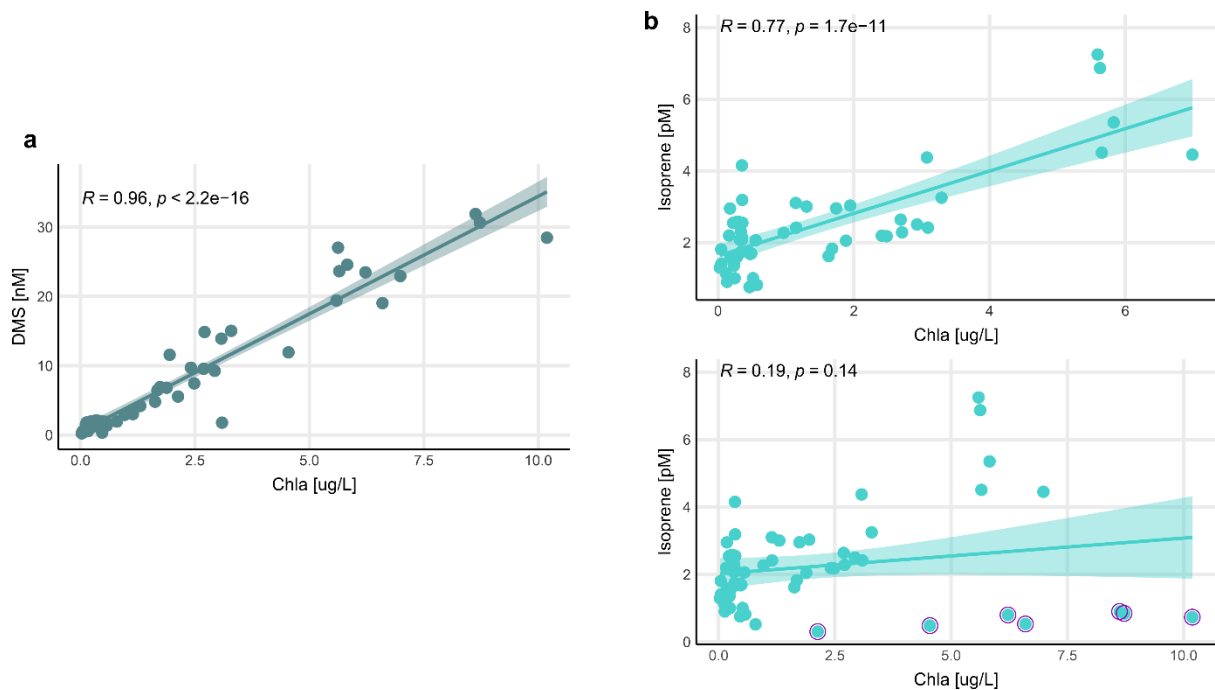

125

126 Figure S8: Correlations of DMS (a) and isoprene (b) with Chl a at sea-ice stations >80°N.

127 Correlations with isoprene were only significant when excluding station 19 (upper panel; see  
 128 explanation in the main text). The lower panel includes all data points >80°N  
 129 are indicated by a purple circle.

130

131 **Supplementary references**

132

- 133 • Callahan et al. DADA2: High-resolution sample inference from Illumina amplicon data. Nature  
 134 Methods 13:581-583.
- 135 • Hsieh et al. (2019). iNEXT: an R package for rarefaction and extrapolation of species diversity (Hill  
 136 numbers). Methods in Ecology and Evolution 7:1451-1456.
- 137 • Cramer (2018). Scientific colour maps (Version 3.0.1). doi: 10.5281/zenodo.1243909
- 138 • Cramer (2018). Geodynamic diagnostics, scientific visualisation and StagLab 3.0. Geosci. Model  
 139 Dev. Discuss. doi: 10.5194/gmd-2017-328
- 140 • McMurdie and Holmes (2013). phyloseq: An R Package for Reproducible Interactive Analysis and  
 141 Graphics of Microbiome Census Data. PLoS ONE 8:e61217.
- 142 • Oksanen et al. (2020). vegan: community ecology package; R package version 2.5-7;  
 143 <https://CRAN.R-project.org/package=vegan>
- 144 • Revelle et al. (2021). psych: Procedures for Psychological, Psychometric, and Personality Research.  
 145 R package version 2.1.9; <https://CRAN.R-project.org/package=psych>
- 146 • Wickham et al., (2019). Welcome to the Tidyverse. Journal of Open Source Software, 4:1686.
